# Supplementary material for: Aligned coaxial tungsten oxide–carbon nanotube sheet: a flexible and gradient electrochromic film
Source: Royal Society of Chemistry journal article supplement (doi:10.1039/c2cc32925e), 2012-01-01
Supplement: c2cc32925e.pdf [file c2cc32925e.pdf]

## Supporting Information

### Aligned Coaxial Tungsten Oxide/Carbon Nanotube Sheet: A Flexible and Gradient Electrochromic Film

Zhaojun Yao, Jiangtao Di, Zhenzhong Yong, Zhigang Zhao\* and Qingwen Li\*

*Suzhou institute of Nano-tech and Nano-bionics (SINANO), Chinese Academy of Sciences, Suzhou 215123, China;*

*E-mail: [zgzhao2011@sinano.ac.cn](mailto:zgzhao2011@sinano.ac.cn); [qwli2007@sinano.ac.cn](mailto:qwli2007@sinano.ac.cn)*

#### Experimental details:

**WO<sub>3</sub> layers coating:** A tungsten hexaaryloxiide compound (W(OC<sub>6</sub>H<sub>5</sub>)<sub>6</sub>) was simply prepared by refluxing WCl<sub>6</sub> with phenol, which was found to be a prominent precursor for WO<sub>3</sub> since it is easily prepared from commercially available WCl<sub>6</sub>, stable to handle and store in air. During the oxide deposition, W(OC<sub>6</sub>H<sub>5</sub>)<sub>6</sub> powders were placed in a ceramic boat, with a CNT sheet hung over the boat. The precursor was then heated to 300-400 °C for 10 mins. When the deposition was finished, the furnace was cooled to room temperature.

**Characterization:** The samples were characterized by scanning electron microscopy (FEI Quanta 400 FEG), high-resolution transmission electron microscopy (HRTEM, FEI Tecnai G2 F20 S-Twin, 200kV), and Raman spectroscopy (Horiba JY Labram HR800 Raman spectrometer, 633 nm excitation). The X-ray diffraction (XRD) patterns were obtained on a D8-Advance Bruker-AXS diffractometer using Cu K $\alpha$  irradiation. The transmission spectra of the samples were obtained using the Perkin-Elmer Lambda 20 spectrophotometer.

**Electrochemical measurement:** Electrochemical measurements were carried out on an electrochemical workstation (CHI660C, Shanghai Chenhua Instruments, Inc.) using a conventional three-electrode test cell. The working electrode was the CNT/WO<sub>3</sub> film. An SCE electrode and Pt foil were used as reference and counter electrode, respectively. Cyclic voltammetry (CV) and chronoamperometry (CA) tests were performed in 1M HClO<sub>4</sub>. CV measurements were carried out at a scanning rate of 20 mV s<sup>-1</sup> between -0.2-1.0 V at room temperature. CA tests were conducted under -1 V.

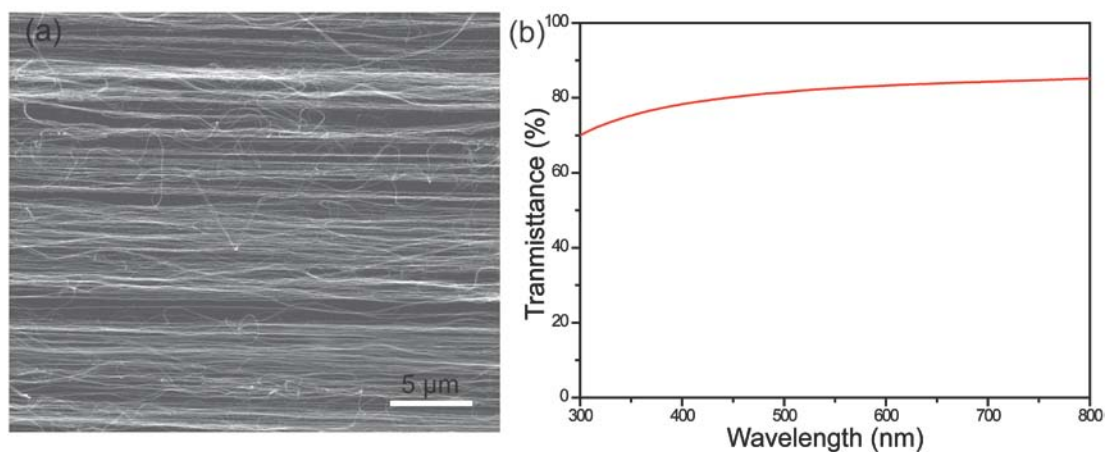

**Fig. S1.** (a) SEM image of CNT sheet drawn from aligned CNT array. (b) UV-Vis spectra of CNT sheets.

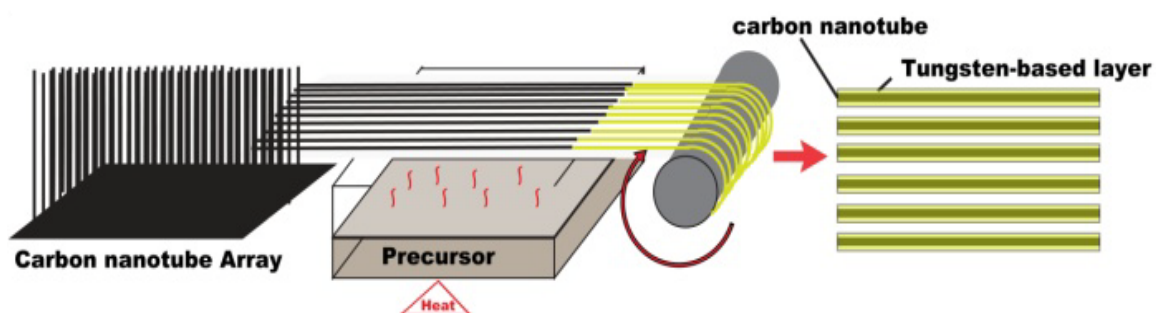

**Fig. S2.** Schematic diagram showing full wrapping of  $\text{WO}_3$  layers on aligned CNT surface to form aligned coaxial  $\text{WO}_3/\text{CNT}$  nanohybrid sheets.

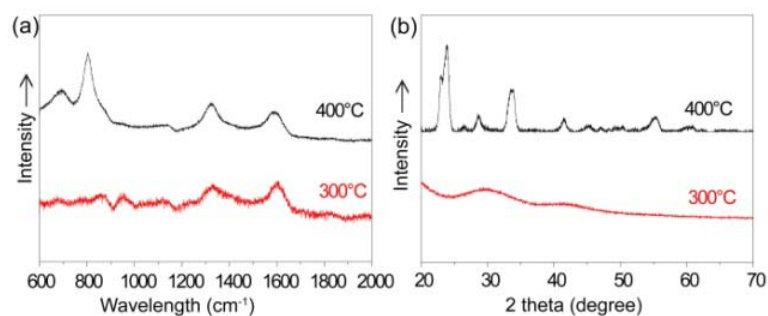

**Fig. S3.** (a) Raman spectra and (b) X-ray diffraction patterns of the films obtained at 300 and 400 °C, respectively.
